# Supplementary material for: Changes in Glial Support of the Hippocampus during the Development of an Alzheimer’s Disease-like Pathology and Their Correction by Mitochondria-Targeted Antioxidant SkQ1
Source: MDPI journal article supplement (doi:10.3390/ijms23031134), 2022-01-20
Supplement: s1 [file s1]

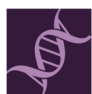

**Table S1.** Distributions of the density of GFAP<sup>+</sup> astrocytes throughout the regions of the hippocampus in OXYS and Wistar rats (counts per 10000  $\mu\text{m}^2$ ).

| Brain area             | Wistar 3 m. | OXYS 3 m.              | Wistar 18 m.           | OXYS 18 m.              | Wistar+SkQ1            | OXYS+SkQ1              |
|------------------------|-------------|------------------------|------------------------|-------------------------|------------------------|------------------------|
| Hippocampus            | 3.97±0.29   | 3.69±0.41              | 2.74±0.21 <sup>^</sup> | 3.83±0.13 <sup>*</sup>  | 3.56±0.20 <sup>#</sup> | 3.53±0.13              |
| CA1 region             | 3.86±0.26   | 3.51±0.36              | 2.35±0.18 <sup>^</sup> | 3.43±0.15 <sup>*</sup>  | 3.18±0.34 <sup>#</sup> | 3.42±0.14              |
| Pyramidal layer of CA1 | 3.83±0.39   | 3.94±0.49              | 2.43±0.28 <sup>^</sup> | 4.14±0.25 <sup>*</sup>  | 3.95±0.67 <sup>#</sup> | 3.94±0.47              |
| Molecular layer of CA1 | 3.90±0.27   | 3.39±0.34              | 2.34±0.17 <sup>^</sup> | 3.30±0.15 <sup>*</sup>  | 3.06±0.30 <sup>#</sup> | 3.33±0.10              |
| CA3 region             | 5.24±0.77   | 5.64±0.86              | 3.09±0.28 <sup>^</sup> | 5.15±0.31 <sup>*</sup>  | 4.48±0.50 <sup>#</sup> | 3.75±0.39 <sup>#</sup> |
| Pyramidal layer of CA3 | 5.72±0.71   | 5.83±0.88              | 2.96±0.28 <sup>^</sup> | 6.86±0.55 <sup>*</sup>  | 5.60±1.09 <sup>#</sup> | 4.27±0.57 <sup>#</sup> |
| Molecular layer of CA3 | 5.23±0.89   | 5.60±0.88              | 3.17±0.33 <sup>^</sup> | 4.62±0.28 <sup>*</sup>  | 4.18±0.43              | 3.52±0.35 <sup>#</sup> |
| Dentate gyrus          | 3.61±0.32   | 2.51±0.27 <sup>*</sup> | 3.21±0.27              | 4.01±0.15 <sup>*^</sup> | 3.80±0.24              | 3.67±0.14              |
| Granular layer of DG   | 2.61±0.33   | 1.68±0.21 <sup>*</sup> | 1.74±0.24 <sup>^</sup> | 2.62±0.21 <sup>*^</sup> | 2.34±0.36              | 2.78±0.26              |
| Molecular layer of DG  | 3.22±0.32   | 2.12±0.26 <sup>*</sup> | 3.20±0.33              | 3.89±0.17 <sup>^</sup>  | 3.88±0.27              | 3.63±0.09              |
| Hilus                  | 6.38±0.64   | 4.93±0.54              | 5.30±0.36              | 6.49±0.48               | 5.41±0.59              | 5.17±0.56              |

\*p < 0.05 for differences between the strains; <sup>^</sup>p < 0.05 for differences from previous age; <sup>#</sup>p < 0.05 for SkQ1 effects; m.: months (age).

**Table S2.** Distributions of the density of vimentin<sup>+</sup> astrocytes throughout the regions of the hippocampus in OXYS and Wistar rats (counts per 10000  $\mu\text{m}^2$ ).

| Brain area             | Wistar 3 m. | OXYS 3 m. | Wistar 18 m.           | OXYS 18 m.              | Wistar+SkQ1            | OXYS+SkQ1              |
|------------------------|-------------|-----------|------------------------|-------------------------|------------------------|------------------------|
| Hippocampus            | 0.28±0.03   | 0.26±0.04 | 0.23±0.03              | 0.38±0.03 <sup>*^</sup> | 0.36±0.02 <sup>#</sup> | 0.43±0.05              |
| CA1 region             | 0.28±0.03   | 0.25±0.04 | 0.35±0.06              | 0.55±0.04 <sup>*^</sup> | 0.58±0.05 <sup>#</sup> | 0.69±0.08              |
| Pyramidal layer of CA1 | 0.29±0.06   | 0.26±0.07 | 0.37±0.08              | 0.51±0.07 <sup>^</sup>  | 0.59±0.11              | 0.47±0.05              |
| Molecular layer of CA1 | 0.28±0.04   | 0.24±0.04 | 0.34±0.06              | 0.56±0.05 <sup>*^</sup> | 0.58±0.04 <sup>#</sup> | 0.72±0.09              |
| CA3 region             | 0.32±0.09   | 0.35±0.07 | 0.44±0.04              | 0.78±0.08 <sup>*^</sup> | 0.67±0.06 <sup>#</sup> | 0.53±0.04 <sup>#</sup> |
| Pyramidal layer of CA3 | 0.38±0.12   | 0.33±0.08 | 0.52±0.10              | 0.95±0.22               | 0.81±0.15              | 0.36±0.07              |
| Molecular layer of CA3 | 0.26±0.07   | 0.33±0.09 | 0.43±0.05              | 0.76±0.06 <sup>*^</sup> | 0.61±0.10              | 0.58±0.07              |
| Dentate gyrus          | 0.17±0.05   | 0.17±0.02 | 0.14±0.02              | 0.24±0.05               | 0.04±0.01 <sup>#</sup> | 0.04±0.01 <sup>#</sup> |
| Granular layer of DG   | 1.05±0.47   | 0.73±0.23 | 0.29±0.07              | 0.31±0.09               | 0.18±0.04              | 0.20±0.03              |
| Molecular layer of DG  | 0.04±0.02   | 0.02±0.01 | 0.66±0.08 <sup>^</sup> | 0.50±0.07 <sup>^</sup>  | 0.45±0.02 <sup>#</sup> | 0.54±0.08              |
| Hilus                  | 0.03±0.02   | 0.19±0.13 | 1.39±0.23 <sup>^</sup> | 0.92±0.06 <sup>^</sup>  | 0.98±0.15              | 0.73±0.13              |

\*p < 0.05 for differences between the strains; <sup>^</sup>p < 0.05 for differences from previous age; <sup>#</sup>p < 0.05 for SkQ1 effects; m.: months (age).

**Table S4.** Distributions of the density of resting microglia throughout the regions of the hippocampus in OXYS and Wistar rats (counts per 10000  $\mu\text{m}^2$ ).

| Brain area             | Wistar 3 m. | OXYS 3 m.  | Wistar 18 m.           | OXYS 18 m.             | Wistar+SkQ1            | OXYS+SkQ1              |
|------------------------|-------------|------------|------------------------|------------------------|------------------------|------------------------|
| Hippocampus            | 0.47±0.07   | 0.61±0.15  | 0.62±0.06              | 0.73±0.06              | 1.08±0.08 <sup>‡</sup> | 1.33±0.12 <sup>‡</sup> |
| CA1 region             | 0.70±0.15   | 0.34±0.05* | 1.04±0.07              | 1.15±0.05 <sup>^</sup> | 1.03±0.09              | 1.23±0.11              |
| Pyramidal layer of CA1 | 0.86±0.28   | 0.28±0.05* | 0.98±0.16              | 0.98±0.11 <sup>^</sup> | 0.93±0.09              | 1.10±0.11              |
| Molecular layer of CA1 | 0.67±0.12   | 0.34±0.05* | 1.06±0.07 <sup>^</sup> | 1.17±0.06 <sup>^</sup> | 1.05±0.09              | 1.26±0.12              |
| CA3 region             | 0.65±0.18   | 0.41±0.09  | 1.30±0.21 <sup>^</sup> | 1.37±0.12 <sup>^</sup> | 1.12±0.13              | 1.42±0.11              |
| Pyramidal layer of CA3 | 0.69±0.24   | 0.30±0.08  | 0.92±0.16              | 1.22±0.20 <sup>^</sup> | 1.10±0.15              | 1.23±0.17              |
| Molecular layer of CA3 | 0.65±0.17   | 0.45±0.12  | 1.42±0.26 <sup>^</sup> | 1.44±0.18 <sup>^</sup> | 1.12±0.18              | 1.46±0.13              |
| Dentate gyrus          | 0.43±0.06   | 0.40±0.06  | 1.18±0.10 <sup>^</sup> | 1.24±0.08 <sup>^</sup> | 1.11±0.10              | 1.45±0.15              |
| Granular layer of DG   | 0.51±0.07   | 0.64±0.12  | 0.80±0.15              | 0.96±0.10              | 0.84±0.16              | 0.96±0.11              |
| Molecular layer of DG  | 0.62±0.12   | 0.54±0.09  | 1.28±0.13 <sup>^</sup> | 1.28±0.07 <sup>^</sup> | 1.15±0.09              | 1.51±0.16              |
| Hilus                  | 0.59±0.13   | 0.43±0.08  | 1.06±0.18              | 1.53±0.22 <sup>^</sup> | 1.22±0.16              | 1.75±0.24              |

\*p < 0.05 for differences between the strains; <sup>^</sup>p < 0.05 for differences from previous age; <sup>‡</sup>p < 0.05 for SkQ1 effects; m.: months (age).

**Table S5.** Distributions of the density of activated microglia throughout the regions of the hippocampus in OXYS and Wistar rats (counts per 10000  $\mu\text{m}^2$ ).

| Brain area             | Wistar 3 m. | OXYS 3 m. | Wistar 18 m.           | OXYS 18 m.             | Wistar+SkQ1            | OXYS+SkQ1              |
|------------------------|-------------|-----------|------------------------|------------------------|------------------------|------------------------|
| Hippocampus            | 1.08±0.14   | 1.29±0.07 | 1.01±0.04              | 1.12±0.04              | 0.84±0.06 <sup>‡</sup> | 0.84±0.04 <sup>‡</sup> |
| CA1 region             | 1.24±0.18   | 0.97±0.16 | 0.82±0.07              | 0.85±0.06              | 0.73±0.08              | 0.71±0.04              |
| Pyramidal layer of CA1 | 1.44±0.26   | 0.81±0.15 | 1.04±0.17              | 1.20±0.19              | 0.88±0.14              | 0.78±0.04              |
| Molecular layer of CA1 | 1.20±0.16   | 0.99±0.17 | 0.78±0.06 <sup>^</sup> | 0.81±0.06              | 0.71±0.07              | 0.70±0.04              |
| CA3 region             | 1.84±0.35   | 1.33±0.19 | 0.97±0.12              | 1.28±0.12              | 0.97±0.07              | 1.12±0.12              |
| Pyramidal layer of CA3 | 1.63±0.46   | 1.03±0.14 | 1.18±0.22              | 1.66±0.18 <sup>^</sup> | 0.72±0.12              | 1.37±0.23              |
| Molecular layer of CA3 | 1.92±0.35   | 1.45±0.22 | 0.90±0.15 <sup>^</sup> | 1.12±0.13              | 1.08±0.07              | 1.03±0.11              |
| Dentate gyrus          | 1.09±0.21   | 0.81±0.11 | 0.91±0.02              | 0.90±0.07              | 0.94±0.07              | 0.96±0.04              |
| Granular layer of DG   | 1.70±0.48   | 0.65±0.10 | 0.97±0.08              | 0.91±0.10              | 0.87±0.08              | 0.77±0.08              |
| Molecular layer of DG  | 1.04±0.18   | 0.74±0.13 | 0.72±0.03              | 0.63±0.05              | 0.81±0.06              | 0.76±0.04              |
| Hilus                  | 3.29±0.69   | 2.65±0.42 | 1.64±0.13              | 2.13±0.17              | 1.65±0.18              | 1.97±0.11              |

<sup>^</sup>p < 0.05 for differences compared to previous age; <sup>‡</sup>p < 0.05 for SkQ1 effects; m.: months (age).

**Table S6.** The number of pyknotic nuclei and their percentage phagocytosed by microglia in OXYS and Wistar rats (counts per 10000  $\mu\text{m}^2$ ).

|                                                            | <b>Wistar 18 m.</b> | <b>OXYS 18 m.</b> | <b>Wistar+SkQ1</b>           | <b>OXYS+SkQ1</b> |
|------------------------------------------------------------|---------------------|-------------------|------------------------------|------------------|
| Number of pyknotic nuclei per<br>10000 $\mu\text{m}^2$     | 8.90 $\pm$ 1.61     | 6.88 $\pm$ 0.92   | 4.86 $\pm$ 0.43 <sup>#</sup> | 5.17 $\pm$ 1.15  |
| Percentage of pyknotic nuclei<br>phagocytosed by microglia | 76.39 $\pm$ 2.57    | 83.82 $\pm$ 3.49  | 77.78 $\pm$ 3.50             | 79.89 $\pm$ 3.37 |

<sup>#</sup>p < 0.05 for SkQ1 effects; m.: months (age).
