# Supplementary material for: Changes in Glial Support of the Hippocampus during the Development of an Alzheimer’s Disease-like Pathology and Their Correction by Mitochondria-Targeted Antioxidant SkQ1
Source: MDPI journal article supplement (doi:10.3390/ijms23031134), 2022-01-20
Supplement: s1 [file s1]

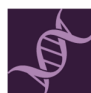

**Table S3.** DEGs specific for astrocytes in the hippocampus of OXYS and Wistar rats at 5 and 18 months of age.

| DEGs upregulated in OXYS rats compared to Wistar rats at 5 months | DEGs downregulated in OXYS rats compared to Wistar rats at 5 months | DEGs upregulated in OXYS rats compared to Wistar rats at 18 months | DEGs downregulated in OXYS rats compared to Wistar rats at 18 months |
|-------------------------------------------------------------------|---------------------------------------------------------------------|--------------------------------------------------------------------|----------------------------------------------------------------------|
| <i>Itga7</i>                                                      | <i>Ptplb</i>                                                        | <i>Fosb</i>                                                        | <i>Bdkrb2</i>                                                        |
| <i>Slc1a4</i>                                                     | <i>Bdkrb2</i>                                                       | <i>Tom1l1</i>                                                      | <i>Cth</i>                                                           |
| <i>Fosb</i>                                                       | <i>Cth</i>                                                          | <i>Acsf2</i>                                                       | <i>Cyp1b1</i>                                                        |
| <i>Tom1l1</i>                                                     | <i>Cyp1b1</i>                                                       | <i>Agt</i>                                                         | <i>Evc</i>                                                           |
|                                                                   | <i>Evc</i>                                                          | <i>Cbs</i>                                                         | <i>Gem</i>                                                           |
|                                                                   | <i>Gem</i>                                                          | <i>Chsy1</i>                                                       | <i>Itih3</i>                                                         |
|                                                                   | <i>Itih3</i>                                                        | <i>Fos</i>                                                         | <i>Alpk1</i>                                                         |
|                                                                   |                                                                     | <i>Gfap</i>                                                        | <i>Dclk2</i>                                                         |
|                                                                   |                                                                     | <i>Hes1</i>                                                        | <i>Egfr</i>                                                          |
|                                                                   |                                                                     | <i>Igfbp5</i>                                                      | <i>Elovl5</i>                                                        |
|                                                                   |                                                                     | <i>Lrtm2</i>                                                       | <i>Igsf11</i>                                                        |
|                                                                   |                                                                     | <i>Naprt1</i>                                                      | <i>Il33</i>                                                          |
|                                                                   |                                                                     | <i>Pamr1</i>                                                       | <i>Kcna2</i>                                                         |
|                                                                   |                                                                     | <i>Plagl1</i>                                                      | <i>Megf10</i>                                                        |
|                                                                   |                                                                     | <i>Ppap2b</i>                                                      | <i>Mtx3</i>                                                          |
|                                                                   |                                                                     | <i>Sept9</i>                                                       | <i>Myo6</i>                                                          |
|                                                                   |                                                                     | <i>Slc25a34</i>                                                    | <i>Pdgfrb</i>                                                        |
|                                                                   |                                                                     | <i>Tpbp</i>                                                        | <i>Pls1</i>                                                          |
|                                                                   |                                                                     |                                                                    | <i>Prodh</i>                                                         |
|                                                                   |                                                                     |                                                                    | <i>Rgs20</i>                                                         |
|                                                                   |                                                                     |                                                                    | <i>Scara3</i>                                                        |
|                                                                   |                                                                     |                                                                    | <i>Slc15a2</i>                                                       |
|                                                                   |                                                                     |                                                                    | <i>Slc30a10</i>                                                      |
|                                                                   |                                                                     |                                                                    | <i>Slc7a11</i>                                                       |
|                                                                   |                                                                     |                                                                    | <i>Slc7a2</i>                                                        |
|                                                                   |                                                                     |                                                                    | <i>Sparcl1</i>                                                       |
|                                                                   |                                                                     |                                                                    | <i>Tmc7</i>                                                          |
|                                                                   |                                                                     |                                                                    | <i>Zfp217</i>                                                        |
| DEGs upregulated in Wistar rats at 18 compared to 5 months of age | DEGs downregulated in Wistar rats at 18 compared to 5 months of age | DEGs upregulated in OXYS rats at 18 compared to 5 months of age    | DEGs downregulated in OXYS rats at 18 compared to 5 months of age    |
| <i>Abhd1</i>                                                      | <i>Thbs1</i>                                                        | <i>Abhd1</i>                                                       | <i>Thbs1</i>                                                         |
| <i>Adhfe1</i>                                                     | <i>Ncan</i>                                                         | <i>Adhfe1</i>                                                      | <i>Ncan</i>                                                          |
| <i>Aldoc</i>                                                      | <i>Lpp</i>                                                          | <i>Aldoc</i>                                                       | <i>Lpp</i>                                                           |
| <i>Als2cl</i>                                                     | <i>Ltbp1</i>                                                        | <i>Als2cl</i>                                                      | <i>Ltbp1</i>                                                         |
| <i>Ccdc157</i>                                                    | <i>Rasgrp1</i>                                                      | <i>Ccdc157</i>                                                     | <i>Rasgrp1</i>                                                       |
| <i>Col16a1</i>                                                    | <i>Sema6d</i>                                                       | <i>Col16a1</i>                                                     | <i>Sema6d</i>                                                        |
| <i>Echdc2</i>                                                     | <i>Gabrb1</i>                                                       | <i>Echdc2</i>                                                      | <i>Gabrb1</i>                                                        |
| <i>Etv4</i>                                                       | <i>Ank2</i>                                                         | <i>Etv4</i>                                                        | <i>Ank2</i>                                                          |
| <i>Ezr</i>                                                        | <i>Slc1a2</i>                                                       | <i>Ezr</i>                                                         | <i>Slc1a2</i>                                                        |
| <i>F3</i>                                                         | <i>Notch3</i>                                                       | <i>F3</i>                                                          | <i>Notch3</i>                                                        |
| <i>Fgfr3</i>                                                      | <i>Znrf3</i>                                                        | <i>Fgfr3</i>                                                       | <i>Znrf3</i>                                                         |
| <i>Fxyd1</i>                                                      | <i>Lama2</i>                                                        | <i>Fxyd1</i>                                                       | <i>Lama2</i>                                                         |
| <i>Fzd9</i>                                                       | <i>Rab30</i>                                                        | <i>Fzd9</i>                                                        | <i>Rab30</i>                                                         |

|                 |                 |                 |                 |
|-----------------|-----------------|-----------------|-----------------|
| <i>Gli1</i>     | <i>Slc7a11</i>  | <i>Gli1</i>     | <i>Slc7a11</i>  |
| <i>Hes1</i>     | <i>Slc7a2</i>   | <i>Hes1</i>     | <i>Slc7a2</i>   |
| <i>Hmgn3</i>    | <i>Ednrb</i>    | <i>Hmgn3</i>    | <i>Ednrb</i>    |
| <i>Hsd11b1</i>  | <i>Kcna2</i>    | <i>Hsd11b1</i>  | <i>Kcna2</i>    |
| <i>Htra1</i>    | <i>Ptplad1</i>  | <i>Htra1</i>    | <i>Ptplad1</i>  |
| <i>Id1</i>      | <i>Nr4a2</i>    | <i>Id1</i>      | <i>Nr4a2</i>    |
| <i>Id3</i>      | <i>Egfr</i>     | <i>Id3</i>      | <i>Egfr</i>     |
| <i>Itih3</i>    | <i>Grm5</i>     | <i>Itih3</i>    | <i>Grm5</i>     |
| <i>Klf15</i>    | <i>Gabbr2</i>   | <i>Klf15</i>    | <i>Gabbr2</i>   |
| <i>Mt3</i>      | <i>Col4a5</i>   | <i>Mt3</i>      | <i>Col4a5</i>   |
| <i>Mtmr11</i>   | <i>Slc4a4</i>   | <i>Mtmr11</i>   | <i>Slc4a4</i>   |
| <i>Naaa</i>     | <i>Dclk1</i>    | <i>Naaa</i>     | <i>Dclk1</i>    |
| <i>Naprt1</i>   | <i>Sorl1</i>    | <i>Naprt1</i>   | <i>Sorl1</i>    |
| <i>Ndrp2</i>    | <i>Ptprz1</i>   | <i>Ndrp2</i>    | <i>Ptprz1</i>   |
| <i>Paqr6</i>    | <i>Agl</i>      | <i>Paqr6</i>    | <i>Agl</i>      |
| <i>Pla2g3</i>   | <i>Igfbp5</i>   | <i>Pla2g3</i>   | <i>Igfbp5</i>   |
| <i>Prdx6</i>    | <i>Gja1</i>     | <i>Prdx6</i>    | <i>Gja1</i>     |
| <i>Prodh</i>    | <i>Prrx1</i>    | <i>Prodh</i>    | <i>Prrx1</i>    |
| <i>Rapgef3</i>  | <i>Shc3</i>     | <i>Rapgef3</i>  | <i>Shc3</i>     |
| <i>Rnf215</i>   | <i>Bmpr1a</i>   | <i>Rnf215</i>   | <i>Bmpr1a</i>   |
| <i>Slc13a5</i>  | <i>Cyp1b1</i>   | <i>Slc13a5</i>  | <i>Cyp1b1</i>   |
| <i>Slc25a42</i> | <i>Dag1</i>     | <i>Slc25a42</i> | <i>Dag1</i>     |
| <i>Slc26a6</i>  | <i>Nr4a3</i>    | <i>Slc26a6</i>  | <i>Nr4a3</i>    |
| <i>Slc7a10</i>  | <i>Atp2b4</i>   | <i>Slc7a10</i>  | <i>Atp2b4</i>   |
| <i>Upp1</i>     | <i>Trps1</i>    | <i>Upp1</i>     | <i>Trps1</i>    |
| <i>C4b</i>      | <i>Sash1</i>    | <i>Acsbg1</i>   | <i>Sash1</i>    |
| <i>Cntfr</i>    | <i>Tmem229a</i> | <i>Agt</i>      | <i>Tmem229a</i> |
| <i>Cyp4f17</i>  | <i>Tmem56</i>   | <i>Btbd17</i>   | <i>Tmem56</i>   |
| <i>Daam2</i>    | <i>Nr3c2</i>    | <i>Camk2g</i>   | <i>Nr3c2</i>    |
| <i>Dclk2</i>    | <i>Nedd9</i>    | <i>Cbr3</i>     | <i>Nedd9</i>    |
| <i>Fbrsl1</i>   | <i>Dtna</i>     | <i>Cbs</i>      | <i>Dtna</i>     |
| <i>Gjb6</i>     | <i>Myo6</i>     | <i>Ccdc37</i>   | <i>Myo6</i>     |
| <i>Itga7</i>    | <i>Fat1</i>     | <i>Cldn10</i>   | <i>Fat1</i>     |
| <i>Leng8</i>    | <i>Npas3</i>    | <i>Clu</i>      | <i>Npas3</i>    |
| <i>Mgst1</i>    | <i>Arhgap26</i> | <i>Ephx2</i>    | <i>Arhgap26</i> |
| <i>Mro</i>      | <i>Itga6</i>    | <i>Fgfbp3</i>   | <i>Itga6</i>    |
| <i>Muc1</i>     | <i>Phka1</i>    | <i>Fgfr2</i>    | <i>Phka1</i>    |
| <i>Pdk4</i>     | <i>Abca1</i>    | <i>Gabbr1</i>   | <i>Abca1</i>    |
| <i>Ppp1r3g</i>  | <i>Ptar1</i>    | <i>Gadd45g</i>  | <i>Ptar1</i>    |
| <i>Slc9a3r1</i> | <i>Vcl</i>      | <i>Gfap</i>     | <i>Vcl</i>      |
| <i>Tnfrsf8</i>  | <i>Sept11</i>   | <i>Hhip1</i>    | <i>Sept11</i>   |
| <i>Vegfa</i>    | <i>Ntrk3</i>    | <i>Jun</i>      | <i>Ntrk3</i>    |
|                 | <i>Amot</i>     | <i>Lhx2</i>     | <i>Amot</i>     |
|                 | <i>Smo</i>      | <i>Lxn</i>      | <i>Smo</i>      |
|                 | <i>Rorb</i>     | <i>Mfge8</i>    | <i>Rorb</i>     |
|                 | <i>Elovl5</i>   | <i>Mlc1</i>     | <i>Elovl5</i>   |
|                 | <i>Elovl2</i>   | <i>Nr2e1</i>    | <i>Elovl2</i>   |
|                 | <i>Fmn2</i>     | <i>Nrarp</i>    | <i>Fmn2</i>     |
|                 | <i>Plagl1</i>   | <i>Ntsr2</i>    | <i>Plagl1</i>   |
|                 | <i>Soat1</i>    | <i>Paqr7</i>    | <i>Soat1</i>    |

|                   |                 |                   |
|-------------------|-----------------|-------------------|
| <i>Ppp1r12a</i>   | <i>Pdpn</i>     | <i>Ppp1r12a</i>   |
| <i>Eea1</i>       | <i>Sept9</i>    | <i>Eea1</i>       |
| <i>Slc6a11</i>    | <i>Slc25a18</i> | <i>Slc6a11</i>    |
| <i>Bai3</i>       | <i>Slc25a34</i> | <i>Bai3</i>       |
| <i>Dgkb</i>       | <i>Tmem51</i>   | <i>Dgkb</i>       |
| <i>Bcl2</i>       | <i>Tspan7</i>   | <i>Bcl2</i>       |
| <i>Mboat2</i>     | <i>Tst</i>      | <i>Mboat2</i>     |
| <i>Arhgap5</i>    | <i>Ttc14</i>    | <i>Arhgap5</i>    |
| <i>Ntrk2</i>      | <i>Wsb1</i>     | <i>Ntrk2</i>      |
| <i>Smc4</i>       |                 | <i>Smc4</i>       |
| <i>Pou3f2</i>     |                 | <i>Pou3f2</i>     |
| <i>Ccdc80</i>     |                 | <i>Ccdc80</i>     |
| <i>Slitrk2</i>    |                 | <i>Slitrk2</i>    |
| <i>Bmpr1b</i>     |                 | <i>Bmpr1b</i>     |
| <i>Enah</i>       |                 | <i>Enah</i>       |
| <i>Son</i>        |                 | <i>Son</i>        |
| <i>Drp2</i>       |                 | <i>Drp2</i>       |
| <i>Lrrk2</i>      |                 | <i>Lrrk2</i>      |
| <i>Gli3</i>       |                 | <i>Gli3</i>       |
| <i>Grm3</i>       |                 | <i>Grm3</i>       |
| <i>Spry4</i>      |                 | <i>Spry4</i>      |
| <i>Cd44</i>       |                 | <i>Cd44</i>       |
| <i>Adcy2</i>      |                 | <i>Adcy2</i>      |
| <i>Limch1</i>     |                 | <i>Limch1</i>     |
| <i>Zdhhc21</i>    |                 | <i>Zdhhc21</i>    |
| <i>Adcyap1r1</i>  |                 | <i>Adcyap1r1</i>  |
| <i>Trib2</i>      |                 | <i>Trib2</i>      |
| <i>Rnf24</i>      |                 | <i>Rnf24</i>      |
| <i>St6galnac5</i> |                 | <i>St6galnac5</i> |
| <i>Kcnn3</i>      |                 | <i>Kcnn3</i>      |
| <i>Arhgef26</i>   |                 | <i>Arhgef26</i>   |
| <i>Nhs1</i>       |                 | <i>Nhs1</i>       |
| <i>Slc14a1</i>    |                 | <i>Slc14a1</i>    |
| <i>Ehbp1</i>      |                 | <i>Ehbp1</i>      |
| <i>Dock7</i>      |                 | <i>Dock7</i>      |
| <i>Cd38</i>       |                 | <i>Gcnt4</i>      |
| <i>Chsy1</i>      |                 | <i>Sfrp1</i>      |
| <i>Pou3f4</i>     |                 | <i>Tmc7</i>       |
| <i>Cbx5</i>       |                 | <i>Tmem47</i>     |
| <i>Sox9</i>       |                 | <i>Slc30a10</i>   |
| <i>Hapln1</i>     |                 | <i>Aqp4</i>       |
| <i>Il17rd</i>     |                 | <i>Hgf</i>        |
| <i>Abcd2</i>      |                 | <i>Alpk1</i>      |
| <i>Rnf180</i>     |                 | <i>Trpm3</i>      |
| <i>Sfxn5</i>      |                 | <i>Mfap3l</i>     |
| <i>Ppp1r3c</i>    |                 | <i>Fgd6</i>       |
| <i>Slc6a1</i>     |                 | <i>Plce1</i>      |
| <i>Dab1</i>       |                 | <i>Emp2</i>       |
| <i>Palld</i>      |                 | <i>Pitpnc1</i>    |
|                   |                 | <i>Pdzrn3</i>     |

*Slc1a4*  
*Cyp7b1*  
*Ckap5*  
*Pdgfrb*  
*Nrcam*  
*Car8*  
*Kcnj10*  
*Rb1*  
*Lomrf3*  
*Tgfb2*  
*Ptpn13*  
*Igsf11*  
*Prkd1*  
*Tril*  
*Alcam*  
*Prdm16*  
*Cachd1*  
*Rgs20*  
*Dpf3*  
*Timp3*  
*Arap2*  
*Ptch1*  
*Rhoq*  
*Axl*  
*Megf10*  
*Stk38l*  
*Cpeb4*  
*Rfx4*  
*Lrp4*  
*Olfml1*  
*Kalrn*  
*Pou3f3*  
*Psd2*

| SkQ1 prevents upregulation of these DEGs from 5 to 18 months in OXYS rats | SkQ1 prevents downregulation of these DEGs from 5 to 18 months in OXYS rats | SkQ1 normalizes these DEGs upregulated in OXYS rats compared to Wistar rats at 18 months of age | SkQ1 normalizes these DEGs downregulated in OXYS rats compared to Wistar rats at 18 months of age |
|---------------------------------------------------------------------------|-----------------------------------------------------------------------------|-------------------------------------------------------------------------------------------------|---------------------------------------------------------------------------------------------------|
| <i>Jun</i>                                                                | <i>Alpk1</i>                                                                | <i>Chsy1</i>                                                                                    | <i>Alpk1</i>                                                                                      |
| <i>Sept9</i>                                                              | <i>Tmc7</i>                                                                 | <i>Hes1</i>                                                                                     | <i>Bdkrb2</i>                                                                                     |
| <i>Hhipl1</i>                                                             | <i>Tmem47</i>                                                               | <i>Plagl1</i>                                                                                   | <i>Egfr</i>                                                                                       |
| <i>Paqr7</i>                                                              | <i>Slc30a10</i>                                                             | <i>Ppap2b</i>                                                                                   | <i>Elovl5</i>                                                                                     |
|                                                                           | <i>Pdgfrb</i>                                                               | <i>Sept9</i>                                                                                    | <i>Evc</i>                                                                                        |
|                                                                           | <i>Rgs20</i>                                                                | <i>Tpbg</i>                                                                                     | <i>Gem</i>                                                                                        |
|                                                                           | <i>Megf10</i>                                                               |                                                                                                 | <i>Il33</i>                                                                                       |
|                                                                           |                                                                             |                                                                                                 | <i>Kcna2</i>                                                                                      |
|                                                                           |                                                                             |                                                                                                 | <i>Megf10</i>                                                                                     |
|                                                                           |                                                                             |                                                                                                 | <i>Myo6</i>                                                                                       |
|                                                                           |                                                                             |                                                                                                 | <i>Pdgfrb</i>                                                                                     |
|                                                                           |                                                                             |                                                                                                 | <i>Pls1</i>                                                                                       |

---

*Rgs20*  
*Scara3*  
*Slc15a2*  
*Slc30a10*  
*Slc7a11*  
*Slc7a2*  
*Tmc7*

---

**Figure S1.** Correlations between densities of vimentin<sup>+</sup> astrocytes (considered “reactive”) and CD68<sup>+</sup> microglia (regarded as “activated”) in hippocampal regions of OXYS and Wistar rats at 18 months of age as well as after SkQ1 treatment.

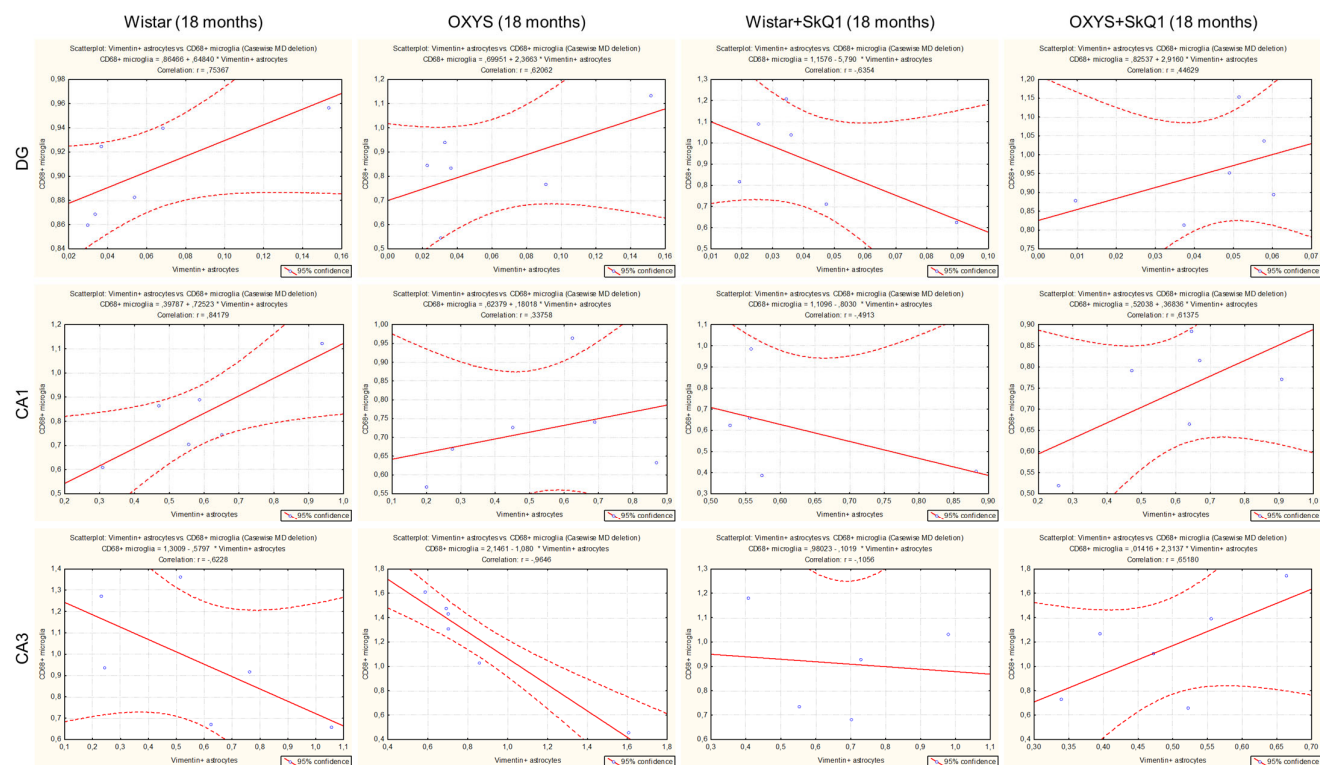

**Figure S2.** Representative immunohistochemical images of a microglial cell (indicated by an arrow) that is phagocytosing a pyknotic nucleus (indicated by a dashed arrow) in the molecular layer of the CA1 hippocampal area of a Wistar rat at 3 months of age. Iba1 is stained green; DAPI (blue) indicates cell nuclei. The scale bar is 20  $\mu\text{m}$ .

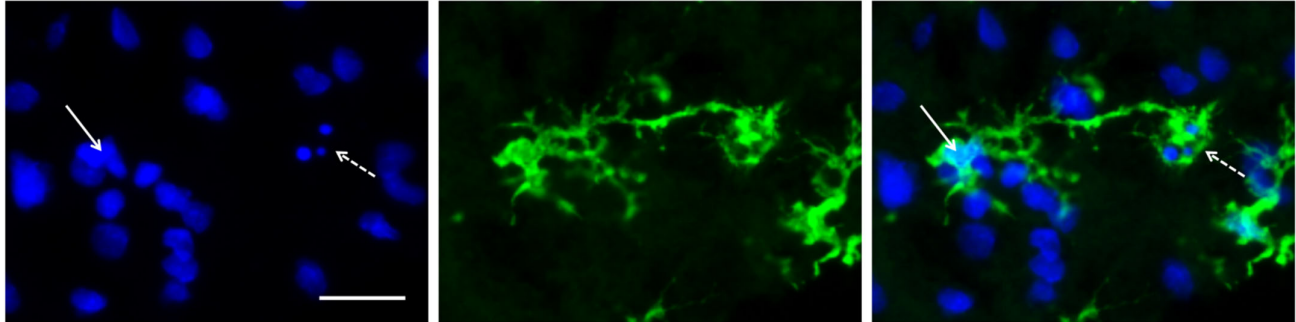

**Table S7.** DEGs specific for microglia in the hippocampus of OXYS and Wistar rats at 5 and 18 months of age.

| DEGs upregulated in OXYS rats compared to Wistar rats at 5 months | DEGs downregulated in OXYS rats compared to Wistar rats at 5 months | DEGs upregulated in OXYS rats compared to Wistar rats at 18 months | DEGs downregulated in OXYS rats compared to Wistar rats at 18 months |
|-------------------------------------------------------------------|---------------------------------------------------------------------|--------------------------------------------------------------------|----------------------------------------------------------------------|
| <i>Aldh16a1</i>                                                   | <i>Cd48</i>                                                         | <i>Cebpb</i>                                                       | <i>Abca9</i>                                                         |
| <i>Map3k14</i>                                                    | <i>Cyp4v3</i>                                                       | <i>Efh2</i>                                                        | <i>Adap2</i>                                                         |
|                                                                   |                                                                     | <i>Egr2</i>                                                        | <i>Apobec1</i>                                                       |
|                                                                   |                                                                     | <i>Junb</i>                                                        | <i>Cd48</i>                                                          |
|                                                                   |                                                                     | <i>Map3k14</i>                                                     | <i>Cdk6</i>                                                          |
|                                                                   |                                                                     | <i>P2ry2</i>                                                       | <i>Ctss</i>                                                          |
|                                                                   |                                                                     | <i>Paox</i>                                                        | <i>Cyp4v3</i>                                                        |
|                                                                   |                                                                     | <i>Plekho1</i>                                                     | <i>Hk2</i>                                                           |
|                                                                   |                                                                     | <i>Ptgs1</i>                                                       | <i>Mlxipl</i>                                                        |
|                                                                   |                                                                     | <i>Rgs14</i>                                                       | <i>Nhlrc3</i>                                                        |
|                                                                   |                                                                     | <i>Syng1</i>                                                       | <i>P2ry12</i>                                                        |
|                                                                   |                                                                     | <i>Tmem206</i>                                                     | <i>Pik3cg</i>                                                        |
|                                                                   |                                                                     | <i>Tor3a</i>                                                       | <i>S100a9</i>                                                        |
|                                                                   |                                                                     | <i>Vps18</i>                                                       | <i>Scpep1</i>                                                        |
|                                                                   |                                                                     |                                                                    | <i>Skap2</i>                                                         |
|                                                                   |                                                                     |                                                                    | <i>Slc11a1</i>                                                       |
|                                                                   |                                                                     |                                                                    | <i>Slc2a5</i>                                                        |
|                                                                   |                                                                     |                                                                    | <i>Spp1</i>                                                          |
|                                                                   |                                                                     |                                                                    | <i>Tlr13</i>                                                         |
|                                                                   |                                                                     |                                                                    | <i>Ubc</i>                                                           |
| DEGs upregulated in Wistar rats at 18 compared to 5 months of age | DEGs downregulated in Wistar rats at 18 compared to 5 months of age | DEGs upregulated in OXYS rats at 18 compared to 5 months of age    | DEGs downregulated in OXYS rats at 18 compared to 5 months of age    |
| <i>Abhd12</i>                                                     | <i>Atp8a2</i>                                                       | <i>Abhd12</i>                                                      | <i>Atp8a2</i>                                                        |
| <i>Abi3</i>                                                       | <i>Dtx4</i>                                                         | <i>Abi3</i>                                                        | <i>Dtx4</i>                                                          |
| <i>Acads</i>                                                      | <i>Edem1</i>                                                        | <i>Acads</i>                                                       | <i>Edem1</i>                                                         |
| <i>Aif1</i>                                                       | <i>Gpr165</i>                                                       | <i>Aif1</i>                                                        | <i>Gpr165</i>                                                        |
| <i>Aldh16a1</i>                                                   | <i>Hivep3</i>                                                       | <i>Aldh16a1</i>                                                    | <i>Hivep3</i>                                                        |
| <i>Alox5ap</i>                                                    | <i>Kctd12</i>                                                       | <i>Alox5ap</i>                                                     | <i>Kctd12</i>                                                        |
| <i>Arl11</i>                                                      | <i>Pdxk</i>                                                         | <i>Arl11</i>                                                       | <i>Pdxk</i>                                                          |
| <i>Armc5</i>                                                      | <i>Plxdc2</i>                                                       | <i>Armc5</i>                                                       | <i>Plxdc2</i>                                                        |
| <i>Arrb2</i>                                                      | <i>Sdc4</i>                                                         | <i>Arrb2</i>                                                       | <i>Sdc4</i>                                                          |
| <i>Asb2</i>                                                       | <i>Sh3pxd2a</i>                                                     | <i>Asb2</i>                                                        | <i>Sh3pxd2a</i>                                                      |
| <i>Blnk</i>                                                       | <i>Sirpa</i>                                                        | <i>Blnk</i>                                                        | <i>Sirpa</i>                                                         |
| <i>C1qa</i>                                                       | <i>Slc7a8</i>                                                       | <i>C1qa</i>                                                        | <i>Slc7a8</i>                                                        |
| <i>C1qb</i>                                                       | <i>Tbc1d2b</i>                                                      | <i>C1qb</i>                                                        | <i>Tbc1d2b</i>                                                       |
| <i>C1qc</i>                                                       | <i>Tgfb1</i>                                                        | <i>C1qc</i>                                                        | <i>Tgfb1</i>                                                         |
| <i>Cables1</i>                                                    | <i>B4galt5</i>                                                      | <i>Cables1</i>                                                     | <i>Abca9</i>                                                         |
| <i>Cd300a</i>                                                     | <i>Egr1</i>                                                         | <i>Cd300a</i>                                                      | <i>Fam46c</i>                                                        |
| <i>Cd33</i>                                                       | <i>Egr2</i>                                                         | <i>Cd33</i>                                                        | <i>Gpr137b</i>                                                       |
| <i>Cd37</i>                                                       | <i>Egr3</i>                                                         | <i>Cd37</i>                                                        | <i>Hk2</i>                                                           |
| <i>Cd68</i>                                                       | <i>Gcnt1</i>                                                        | <i>Cd68</i>                                                        | <i>Lcp1</i>                                                          |
| <i>Cebpa</i>                                                      | <i>Lasp1</i>                                                        | <i>Cebpa</i>                                                       | <i>Orai2</i>                                                         |
| <i>Cebpb</i>                                                      | <i>Syng1</i>                                                        | <i>Cebpb</i>                                                       | <i>Pik3cg</i>                                                        |



|                |               |                |                |
|----------------|---------------|----------------|----------------|
| <i>Clic1</i>   | <i>Tatdn2</i> | <i>Clic1</i>   | <i>Plagl2</i>  |
| <i>Col27a1</i> |               | <i>Col27a1</i> | <i>Plekho2</i> |
| <i>Comtd1</i>  |               | <i>Comtd1</i>  | <i>Slc11a1</i> |
| <i>Cotl1</i>   |               | <i>Cotl1</i>   | <i>Ubash3b</i> |
| <i>Crybb1</i>  |               | <i>Crybb1</i>  | <i>Ubc</i>     |
| <i>Cst3</i>    |               | <i>Cst3</i>    |                |
| <i>Ctsa</i>    |               | <i>Ctsa</i>    |                |
| <i>Ctsb</i>    |               | <i>Ctsb</i>    |                |
| <i>Ctsd</i>    |               | <i>Ctsd</i>    |                |
| <i>Ctsf</i>    |               | <i>Ctsf</i>    |                |
| <i>Ctss</i>    |               | <i>Ctss</i>    |                |
| <i>Ctsz</i>    |               | <i>Ctsz</i>    |                |
| <i>Cyba</i>    |               | <i>Cyba</i>    |                |
| <i>Cyth4</i>   |               | <i>Cyth4</i>   |                |
| <i>Dcxr</i>    |               | <i>Dcxr</i>    |                |
| <i>Dusp5</i>   |               | <i>Dusp5</i>   |                |
| <i>Erp29</i>   |               | <i>Erp29</i>   |                |
| <i>Fcer1g</i>  |               | <i>Fcer1g</i>  |                |
| <i>Fermt3</i>  |               | <i>Fermt3</i>  |                |
| <i>Fes</i>     |               | <i>Fes</i>     |                |
| <i>Fgd2</i>    |               | <i>Fgd2</i>    |                |
| <i>Gadd45b</i> |               | <i>Gadd45b</i> |                |
| <i>Galns</i>   |               | <i>Galns</i>   |                |
| <i>Gna15</i>   |               | <i>Gna15</i>   |                |
| <i>Gpr183</i>  |               | <i>Gpr183</i>  |                |
| <i>Gpr34</i>   |               | <i>Gpr34</i>   |                |
| <i>Gpr84</i>   |               | <i>Gpr84</i>   |                |
| <i>Gpx1</i>    |               | <i>Gpx1</i>    |                |
| <i>Hcls1</i>   |               | <i>Hcls1</i>   |                |
| <i>Herpud1</i> |               | <i>Herpud1</i> |                |
| <i>Hexa</i>    |               | <i>Hexa</i>    |                |
| <i>Hexb</i>    |               | <i>Hexb</i>    |                |
| <i>Hmga1</i>   |               | <i>Hmga1</i>   |                |
| <i>Hmha1</i>   |               | <i>Hmha1</i>   |                |
| <i>Ier2</i>    |               | <i>Ier2</i>    |                |
| <i>Ier5</i>    |               | <i>Ier5</i>    |                |
| <i>Ifi30</i>   |               | <i>Ifi30</i>   |                |
| <i>Ifngr2</i>  |               | <i>Ifngr2</i>  |                |
| <i>Irf1</i>    |               | <i>Irf1</i>    |                |
| <i>Irf8</i>    |               | <i>Irf8</i>    |                |
| <i>Itgb2</i>   |               | <i>Itgb2</i>   |                |
| <i>Junb</i>    |               | <i>Junb</i>    |                |
| <i>Khk</i>     |               | <i>Khk</i>     |                |
| <i>Klf2</i>    |               | <i>Klf2</i>    |                |
| <i>Klk8</i>    |               | <i>Klk8</i>    |                |
| <i>Laptn5</i>  |               | <i>Laptn5</i>  |                |
| <i>Lfn3</i>    |               | <i>Lfn3</i>    |                |
| <i>Lgmn</i>    |               | <i>Lgmn</i>    |                |

---

|                 |                 |
|-----------------|-----------------|
| <i>Lrch4</i>    | <i>Lrch4</i>    |
| <i>Ltc4s</i>    | <i>Ltc4s</i>    |
| <i>Lyl1</i>     | <i>Lyl1</i>     |
| <i>Man2b1</i>   | <i>Man2b1</i>   |
| <i>Matk</i>     | <i>Matk</i>     |
| <i>Mcl1</i>     | <i>Mcl1</i>     |
| <i>Mknk1</i>    | <i>Mknk1</i>    |
| <i>Nab2</i>     | <i>Nab2</i>     |
| <i>Naglu</i>    | <i>Naglu</i>    |
| <i>Nagpa</i>    | <i>Nagpa</i>    |
| <i>Ncf4</i>     | <i>Ncf4</i>     |
| <i>Nfkb1</i>    | <i>Nfkb1</i>    |
| <i>Nfkb2</i>    | <i>Nfkb2</i>    |
| <i>Nfkbid</i>   | <i>Nfkbid</i>   |
| <i>Nhp2</i>     | <i>Nhp2</i>     |
| <i>Ntpcr</i>    | <i>Ntpcr</i>    |
| <i>Pdgfb</i>    | <i>Pdgfb</i>    |
| <i>Pdlim4</i>   | <i>Pdlim4</i>   |
| <i>Pkn1</i>     | <i>Pkn1</i>     |
| <i>Pld4</i>     | <i>Pld4</i>     |
| <i>Plek</i>     | <i>Plek</i>     |
| <i>Pnp</i>      | <i>Pnp</i>      |
| <i>Pnpla2</i>   | <i>Pnpla2</i>   |
| <i>Pnpo</i>     | <i>Pnpo</i>     |
| <i>Ppp1r15a</i> | <i>Ppp1r15a</i> |
| <i>Psmb10</i>   | <i>Psmb10</i>   |
| <i>Psmb8</i>    | <i>Psmb8</i>    |
| <i>Ptpn6</i>    | <i>Ptpn6</i>    |
| <i>Rgs10</i>    | <i>Rgs10</i>    |
| <i>Rhbd2</i>    | <i>Rhbd2</i>    |
| <i>Rilpl1</i>   | <i>Rilpl1</i>   |
| <i>Rilpl2</i>   | <i>Rilpl2</i>   |
| <i>Sap30</i>    | <i>Sap30</i>    |
| <i>Sat1</i>     | <i>Sat1</i>     |
| <i>Sbno2</i>    | <i>Sbno2</i>    |
| <i>Sh3bp1</i>   | <i>Sh3bp1</i>   |
| <i>Sipa1</i>    | <i>Sipa1</i>    |
| <i>Skap2</i>    | <i>Skap2</i>    |
| <i>Snx20</i>    | <i>Snx20</i>    |
| <i>Sord</i>     | <i>Sord</i>     |
| <i>Tbc1d10a</i> | <i>Tbc1d10a</i> |
| <i>Tcirg1</i>   | <i>Tcirg1</i>   |
| <i>Tifab</i>    | <i>Tifab</i>    |
| <i>Tmc6</i>     | <i>Tmc6</i>     |
| <i>Tmem120a</i> | <i>Tmem120a</i> |
| <i>Tmem206</i>  | <i>Tmem206</i>  |
| <i>Tpst2</i>    | <i>Tpst2</i>    |
| <i>Traf3ip3</i> | <i>Traf3ip3</i> |

|                 |                  |
|-----------------|------------------|
| <i>Trem2</i>    | <i>Trem2</i>     |
| <i>Tspo</i>     | <i>Tspo</i>      |
| <i>Tyrobp</i>   | <i>Tyrobp</i>    |
| <i>Uap1l1</i>   | <i>Uap1l1</i>    |
| <i>Unc13d</i>   | <i>Unc13d</i>    |
| <i>Unc93b1</i>  | <i>Unc93b1</i>   |
| <i>Zc3h12a</i>  | <i>Zc3h12a</i>   |
| <i>Apobec1</i>  | <i>Arhgap22</i>  |
| <i>Apoc1</i>    | <i>Arhgap25</i>  |
| <i>Arap1</i>    | <i>Camk1</i>     |
| <i>Arhgap27</i> | <i>Ccdc86</i>    |
| <i>Arhgap4</i>  | <i>Cib1</i>      |
| <i>Arhgap9</i>  | <i>Cln3</i>      |
| <i>B2m</i>      | <i>Coro1a</i>    |
| <i>Casp4</i>    | <i>Dok3</i>      |
| <i>Cd163</i>    | <i>Ebi3</i>      |
| <i>Cd53</i>     | <i>Edem2</i>     |
| <i>Cd74</i>     | <i>Fam105b</i>   |
| <i>Ch25h</i>    | <i>Fam110a</i>   |
| <i>Clec10a</i>  | <i>Gpsm3</i>     |
| <i>Clec4a3</i>  | <i>Jdp2</i>      |
| <i>Cmtm7</i>    | <i>Lat2</i>      |
| <i>Csf1r</i>    | <i>Map3k14</i>   |
| <i>Csf3r</i>    | <i>Myc</i>       |
| <i>Cxcl16</i>   | <i>Myo1f</i>     |
| <i>Dennd1c</i>  | <i>Nbeal2</i>    |
| <i>Dok1</i>     | <i>Nfkbib</i>    |
| <i>Dusp1</i>    | <i>Oaf</i>       |
| <i>Eif4ebp1</i> | <i>Orai1</i>     |
| <i>Emr1</i>     | <i>Plekho1</i>   |
| <i>Eno3</i>     | <i>Ppcdc</i>     |
| <i>F11r</i>     | <i>Psd4</i>      |
| <i>Fcgr2b</i>   | <i>Rnase4</i>    |
| <i>Fhod1</i>    | <i>Rogdi</i>     |
| <i>Grn</i>      | <i>Rtn4rl1</i>   |
| <i>Hck</i>      | <i>Sall1</i>     |
| <i>Hfe</i>      | <i>Selplg</i>    |
| <i>Hmox1</i>    | <i>Snta1</i>     |
| <i>Icam1</i>    | <i>Sun2</i>      |
| <i>Ier3</i>     | <i>Tln1</i>      |
| <i>Ifngr1</i>   | <i>Tnfrsf12a</i> |
| <i>Itgam</i>    | <i>Twf2</i>      |
| <i>Leprel1</i>  |                  |
| <i>Lgals3</i>   |                  |
| <i>Lgals3bp</i> |                  |
| <i>Ly86</i>     |                  |
| <i>Man2b2</i>   |                  |
| <i>Map3k8</i>   |                  |

*Mlxipl*  
*Ncf1*  
*Nfkbia*  
*Nfkbiz*  
*P2ry12*  
*P2ry6*  
*Phf15*  
*Pik3cd*  
*Plcg2*  
*Plod3*  
*Prkcd*  
*Psmb9*  
*Ptpn18*  
*Pxn*  
*Rac2*  
*Ripk3*  
*S100a9*  
*Scpep1*  
*Siglec5*  
*Slc29a1*  
*Slc29a3*  
*Slc2a5*  
*Socs3*  
*Sp110*  
*Spp1*  
*Stxbp2*  
*Tcn2*  
*Tlr6*  
*Tmem173*  
*Tnfaip8l2*  
*Tnfrsf11a*  
*Tnfrsf1a*  
*Trpm2*  
*Trpm4*  
*Vamp8*  
*Vav1*  
*Was*  
*Zfp36*

| SkQ1 prevents upregulation of these DEGs from 5 to 18 months in OXYS rats | SkQ1 prevents downregulation of these DEGs from 5 to 18 months in OXYS rats | SkQ1 normalizes these DEGs upregulated in OXYS rats compared to Wistar rats at 18 months of age | SkQ1 normalizes these DEGs downregulated in OXYS rats compared to Wistar rats at 18 months of age |
|---------------------------------------------------------------------------|-----------------------------------------------------------------------------|-------------------------------------------------------------------------------------------------|---------------------------------------------------------------------------------------------------|
| <i>Arhgap22</i>                                                           | <i>Hk2</i>                                                                  | <i>Cebpb</i>                                                                                    | <i>Hk2</i>                                                                                        |
| <i>Dok3</i>                                                               | <i>Pik3cg</i>                                                               | <i>Egr2</i>                                                                                     | <i>Pik3cg</i>                                                                                     |
| <i>Fam110a</i>                                                            | <i>Slc11a1</i>                                                              | <i>Plekho1</i>                                                                                  | <i>Slc11a1</i>                                                                                    |
| <i>Plekho1</i>                                                            | <i>Ubc</i>                                                                  | <i>Rgs14</i>                                                                                    | <i>Ubc</i>                                                                                        |
| <i>Rogdi</i>                                                              |                                                                             | <i>Tmem206</i>                                                                                  |                                                                                                   |

---

*Rtn4rl1*  
*Snta1*

*Tor3a*

---
